# Supplementary material
Source: Royal Society of Chemistry journal article supplement (doi:10.1039/d6nr01147k)
Supplement: d6nr01147k1.pdf [file d6nr01147k1.pdf]

## Supplementary Information

### Nano-nebula superstructure decorated wood-derived biochar for efficient and rapid antibiotic degradation

Yilong Cui,<sup>a</sup> Yubo Liu,<sup>a</sup> Xin Jin,<sup>a</sup> Yunyi Liang,<sup>a</sup> Yingkuan Du,<sup>a</sup> Weiqiang Chen,<sup>a</sup> Nanfeng Zhu<sup>a</sup> and Changlei Xia<sup>\*\*a</sup>

#### Potential reaction equations involved in this study

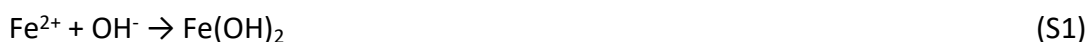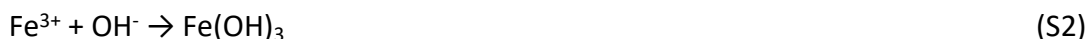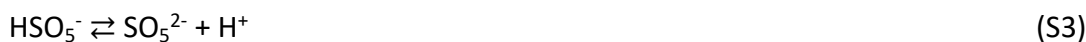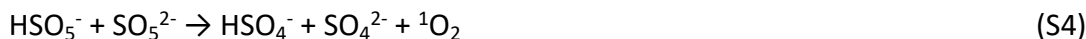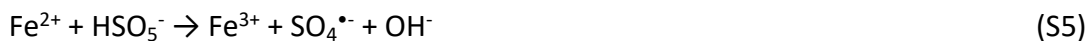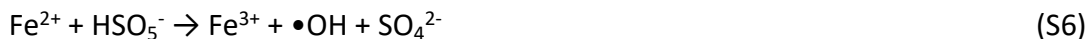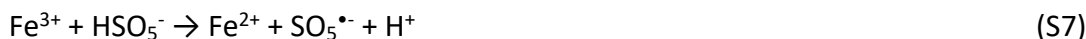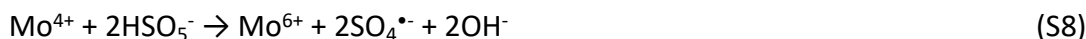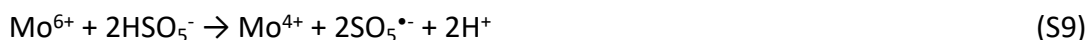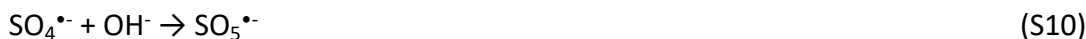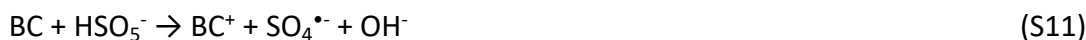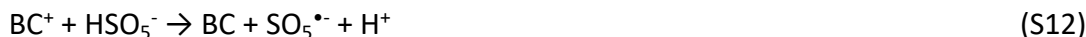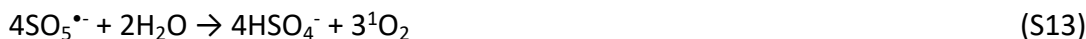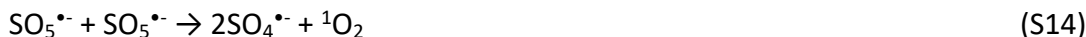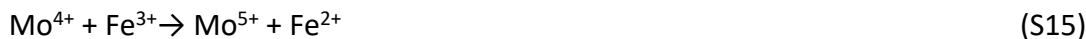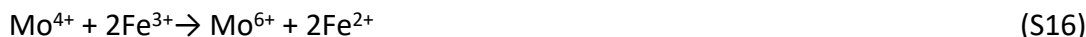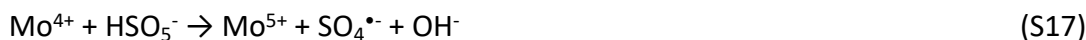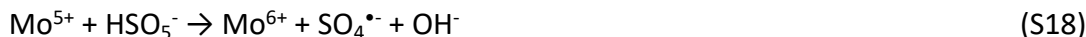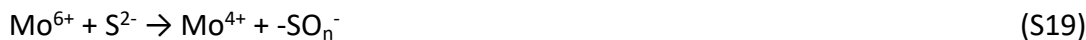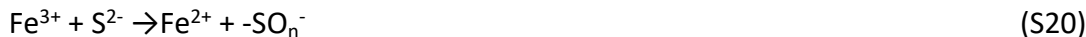

**Table S1.** Comparison of catalytic performance for TC removal among similar catalytic systems.

| System                                                                 | Material Form    | Pollutant | Pollutant concentration (mg/L) | Reaction time (min) | Removal efficiency (%) | Ref.      |
|------------------------------------------------------------------------|------------------|-----------|--------------------------------|---------------------|------------------------|-----------|
| Fe <sup>0</sup> -Fe <sub>3</sub> O <sub>4</sub> @MoS <sub>2</sub> /PMS | Powder           | TC        | 20                             | 120                 | 96.81                  | 1         |
| FeS@BC/PS                                                              | Powder           | TC        | 200                            | 30                  | 87.4                   | 2         |
| Fe/Mo-BC/PS                                                            | Powder           | TC        | 20                             | 60                  | 90.93                  | 3         |
| FBC/PMS                                                                | Powder           | TC        | 30                             | 60                  | 91                     | 4         |
| 6PA-Ni4/PS                                                             | Powder           | TC        | 20                             | 180                 | 94.55                  | 5         |
| N-BCFe/PS                                                              | Powder           | TC        | 10                             | 120                 | 86.56                  | 6         |
| Fe-N@MFC/PS                                                            | Powder           | TC        | 5                              | 60                  | 90.5                   | 7         |
| MIL-88A (Fe)/CoFe <sub>2</sub> O <sub>4</sub> /PS                      | Powder           | TC        | 10                             | 60                  | 90                     | 8         |
| MgFe <sub>2</sub> O <sub>4</sub> -BC/PS                                | Powder           | TC        | 30                             | 90                  | 94.7                   | 9         |
| BCNNSP/PMS                                                             | Monolithic block | TC        | 20                             | 60                  | 94                     | This work |

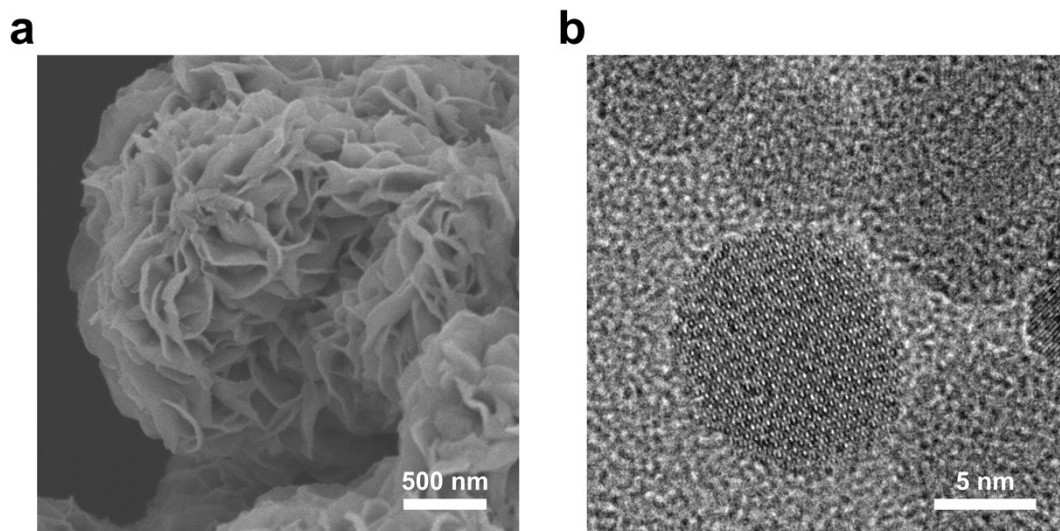

**Fig. S1** (a) SEM image of the MoS<sub>2</sub>. (b) TEM image of the Fe<sub>3</sub>O<sub>4</sub>.

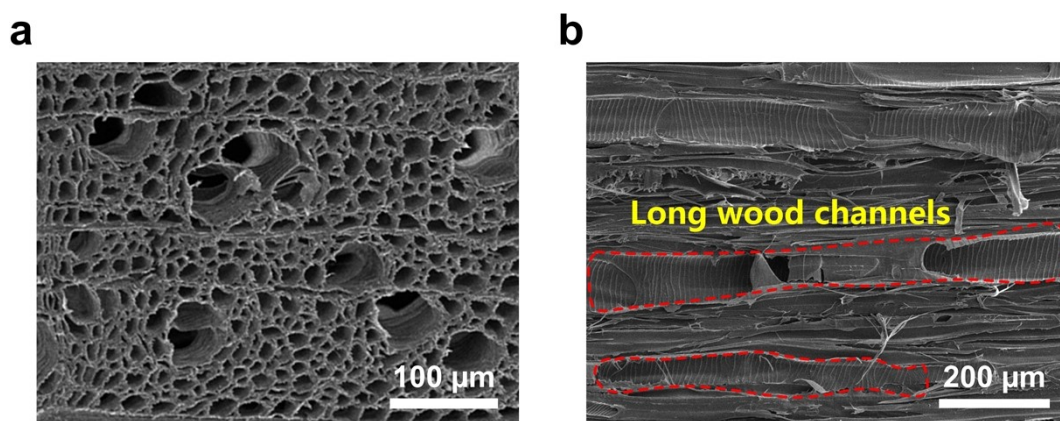

**Fig. S2** SEM images of (a) cross-section and (b) longitudinal section of basswood.

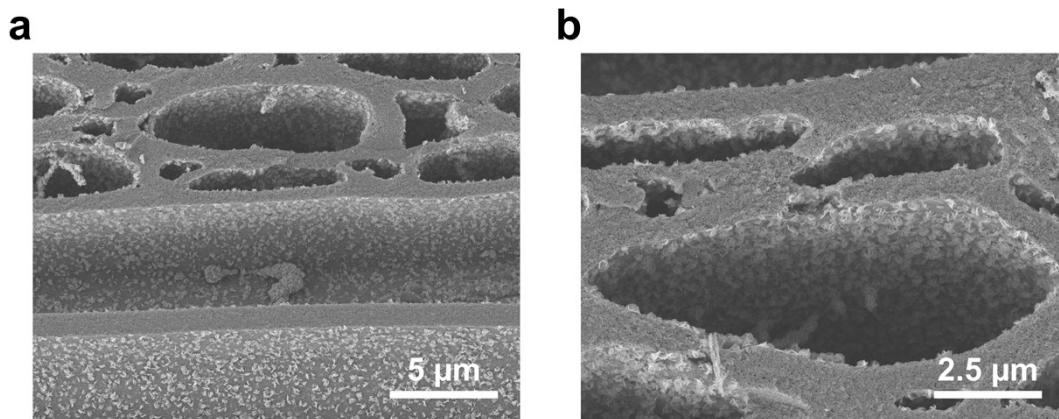

**Fig. S3** SEM image of the BCMS.

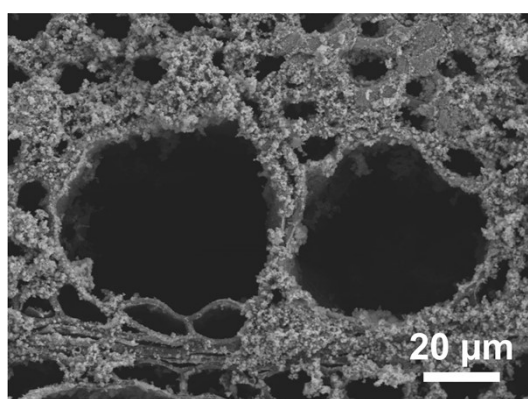

**Fig. S4** SEM image of the BCNNSP.

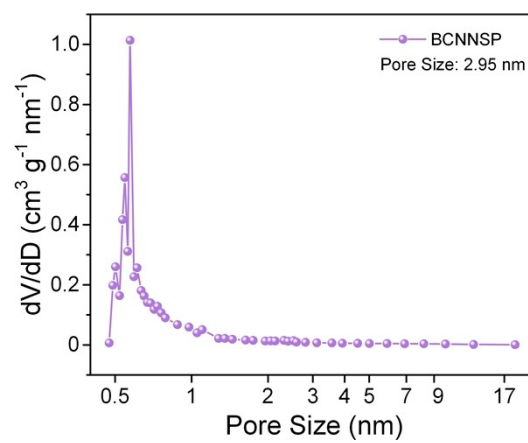

**Fig. S5** The pore size of BCNNSP.

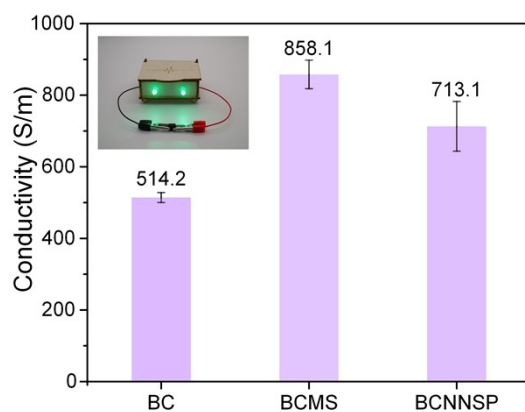

**Fig. S6** Schematic diagram illustrating the electrical conductivity of BC, BCMS, and BCNNSP, along with the illumination of an LED by BCNNSP.

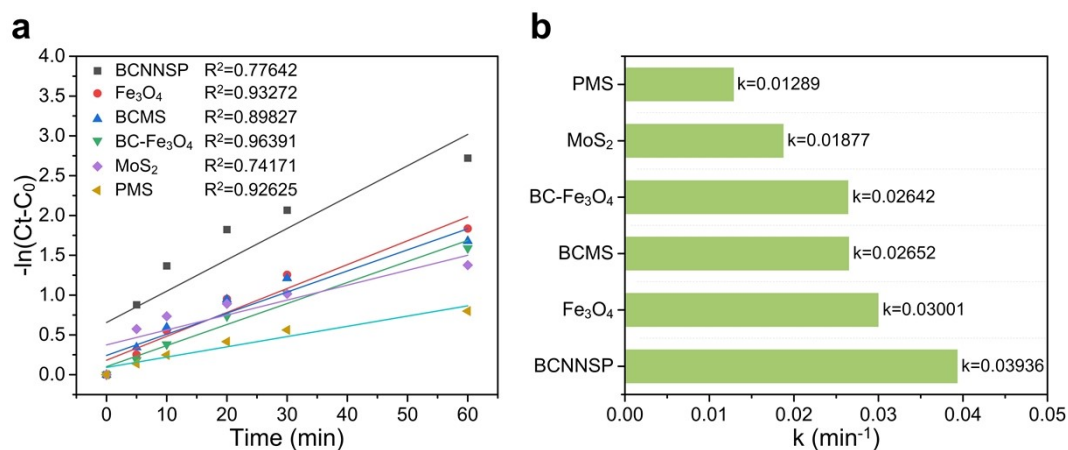

**Fig. S7** (a) Pseudo-first-order kinetic fitting for TC degradation by different catalysts. (b) The corresponding TC degradation rate constants.

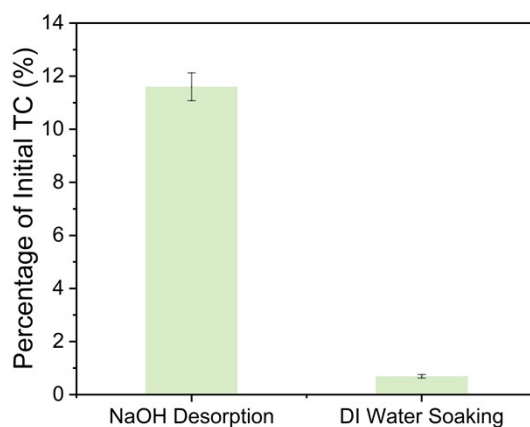

**Fig. S8** Quantitative evaluation of TC residues on the post-reaction BCNNSP via NaOH desorption and DI water soaking.

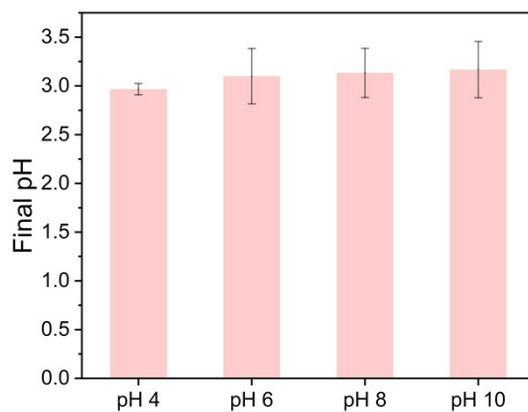

**Fig. S9** Final pH of the BCNNSP/PMS system in solutions with different initial pH values.

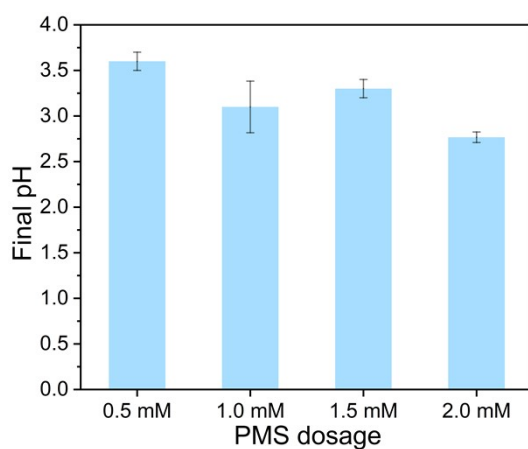

**Fig. S10** Final pH of the BCNNSP/PMS system at different PMS concentrations.

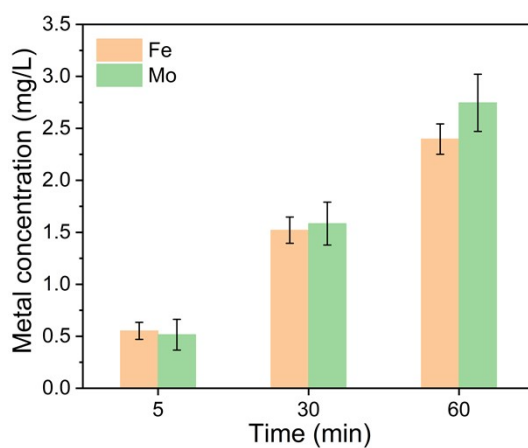

**Fig. S11** Concentrations of leached Fe and Mo ions in the BCNNSP/PMS system after the reaction.

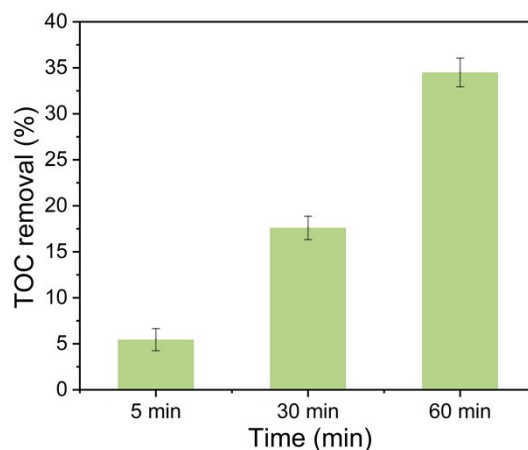

**Fig. S12** The TOC removal of TC in the BCNNSP/PMS system.

## References

- 1 P. Liu, H. L. Shi, X. Y. Feng, C. T. Liu, F. W. Ma and J. F. Wan, *J. Mater. Sci.*, 2024, **59**, 8736-8756.
- 2 J. He, J. C. Tang, Z. Zhang, L. Wang, Q. L. Liu and X. M. Liu, *Chem. Eng. J.*, 2021, **404**, 126997.
- 3 B. B. Wu, Z. Wang, Y. N. Jia, N. N. Xu, L. S. Liao, C. Y. Zhang, Z. W. Wang, Y. X. Shan, W. T. Feng and H. Q. Xue, *Environ. Technol. Innovation*, 2024, **35**, 103736.
- 4 J. R. Fang, F. He, Z. L. Yan, J. J. Wang, R. Yu and H. H. Zhou, *J. Environ. Chem. Eng.*, 2024, **12**, 112923.
- 5 X. H. Wang, W. G. Li, J. Y. Zhang, S. F. Jiang, G. L. Zhang, C. H. Bai, S. C. Wang, Q. Zhao and L. Y. Lv, *Chem. Eng. J.*, 2024, **491**, 151915.
- 6 H. P. Zeng, J. X. Li, J. X. Xu, W. Qi, R. X. Hao, G. W. Gao, D. Lin, D. Li and J. Zhang, *J. Cleaner Prod.*, 2022, **378**, 134519.
- 7 S. N. Zhuo, H. Sun, Z. Y. Wang, H. Y. Ren, D. F. Xing, N. Q. Ren and B. F. Liu, *Chem. Eng. J.*, 2023, **455**, 140702.
- 8 D. T. Tran, T. T. U. Bui, A. T. Phan and T. B. Pham, *Environ. Technol. Innovation*, 2024, **33**, 103502.
- 9 L. Wang, X. P. Lu, G. D. Chen, Y. Z. Zhao and S. L. Wang, *Chem. Eng. J.*, 2023, **468**, 143773.
